# Supplementary material for: Refined Quantification of Infection Bottlenecks and Pathogen Dissemination with STAMPR
Source: PubMed Central journal article supplement (PMC8407386; doi:10.1128/msystems.00887-21), 2021-08-17

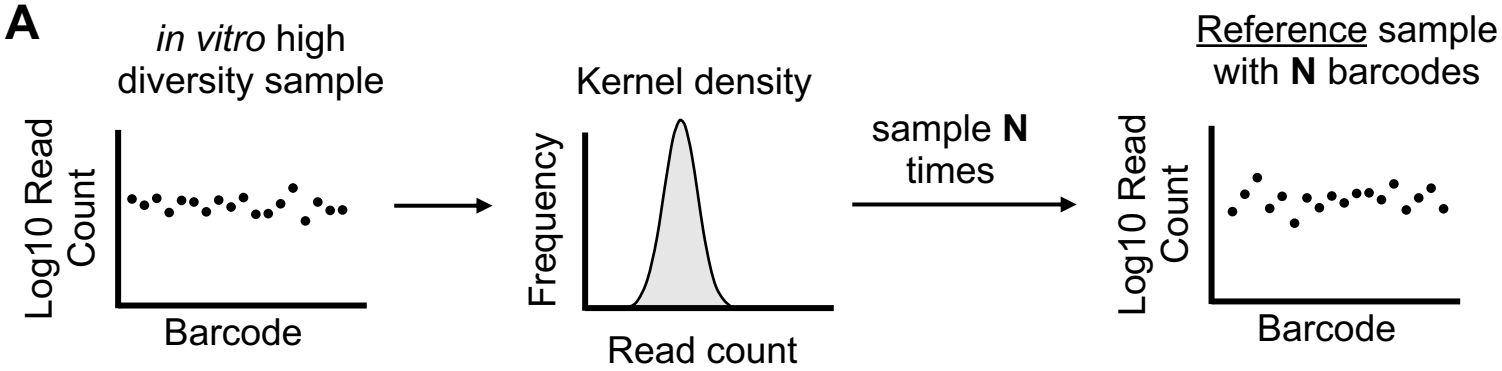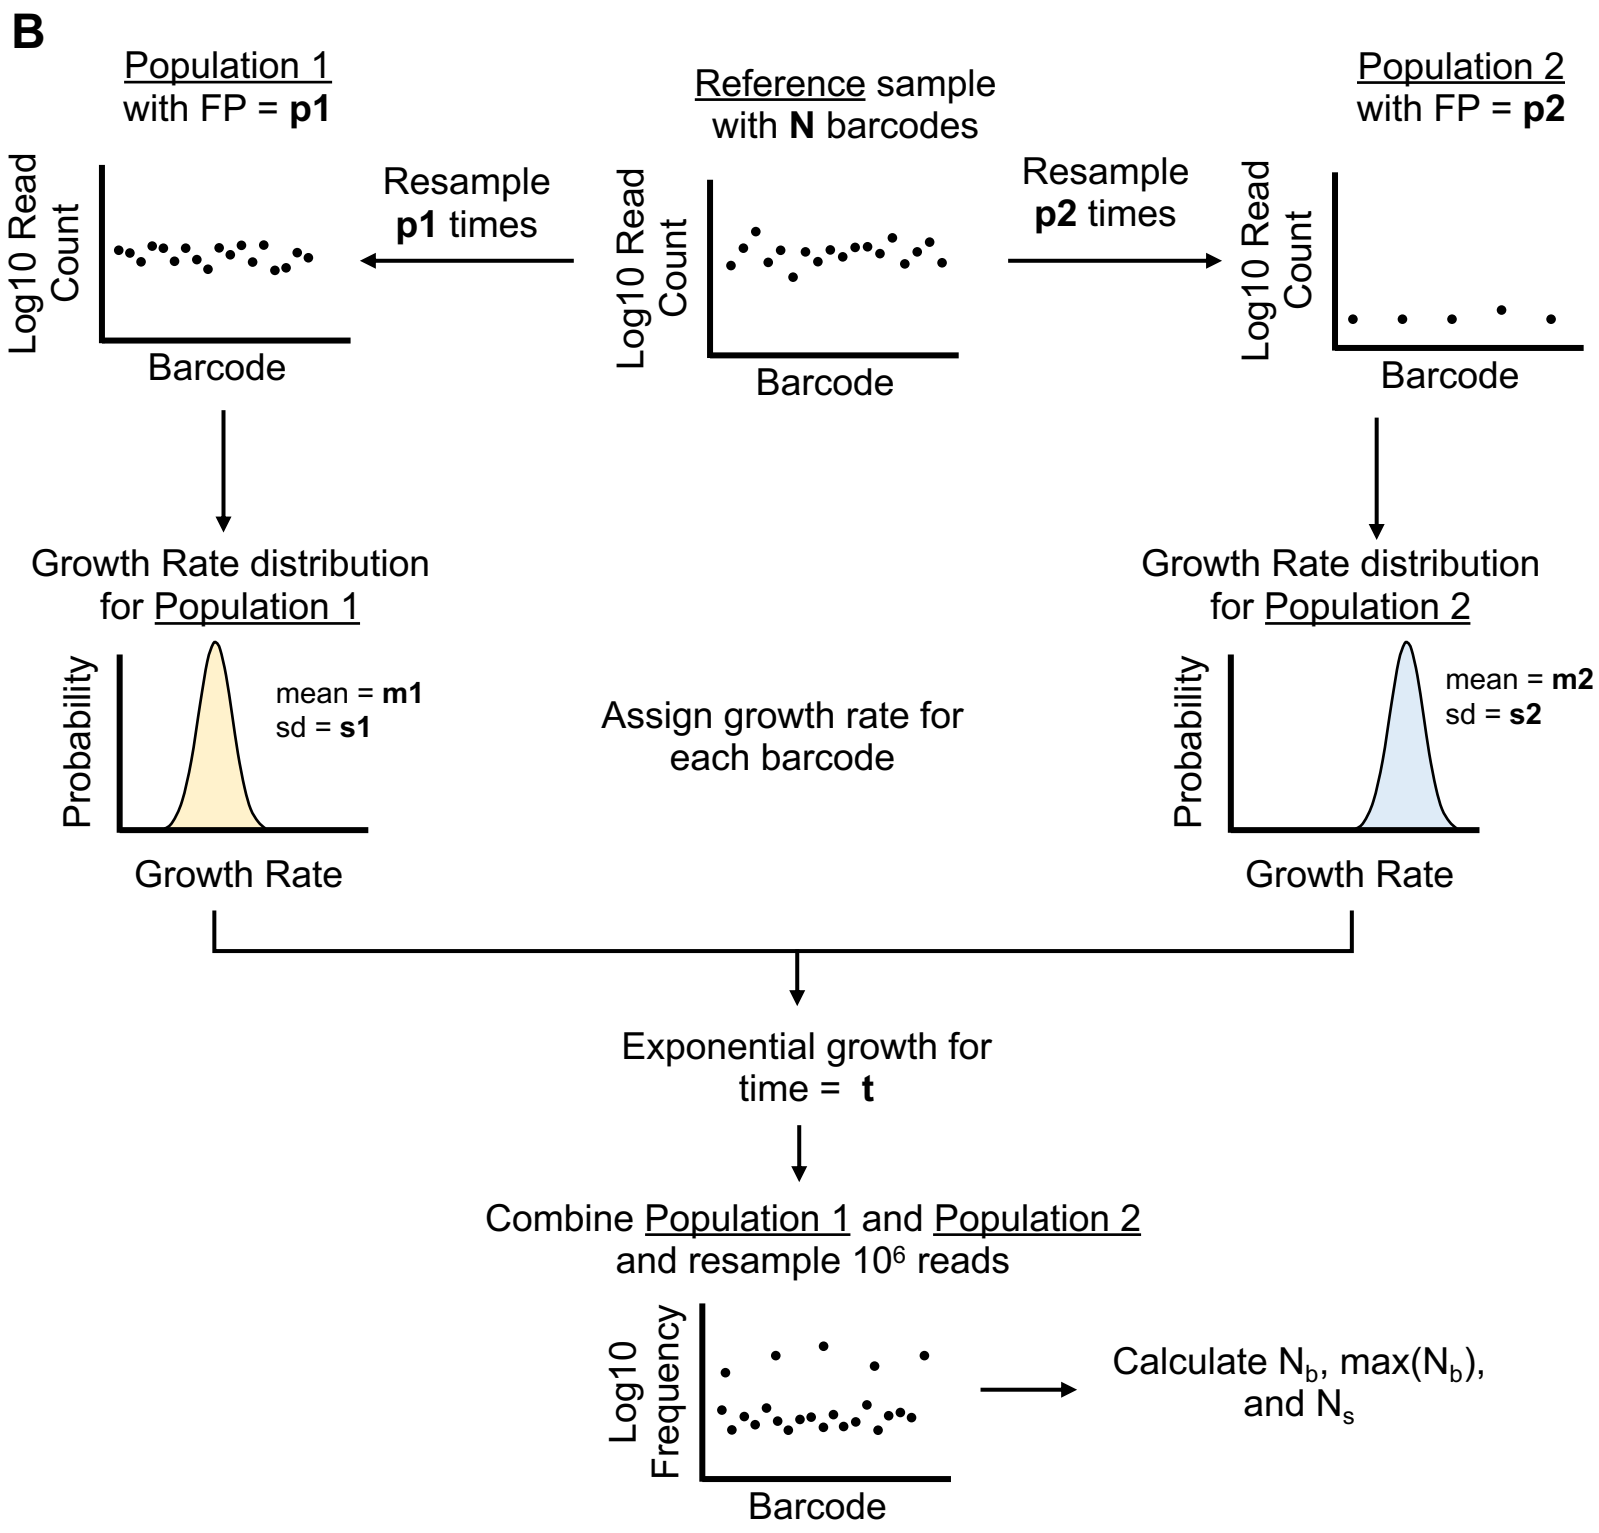

Supplement: msystems.00887-21-sf003.pdf [file msystems.00887-21-sf003.pdf]
