# Supplementary material for: Refined Quantification of Infection Bottlenecks and Pathogen Dissemination with STAMPR
Source: PubMed Central journal article supplement (PMC8407386; doi:10.1128/msystems.00887-21), 2021-08-17

**A**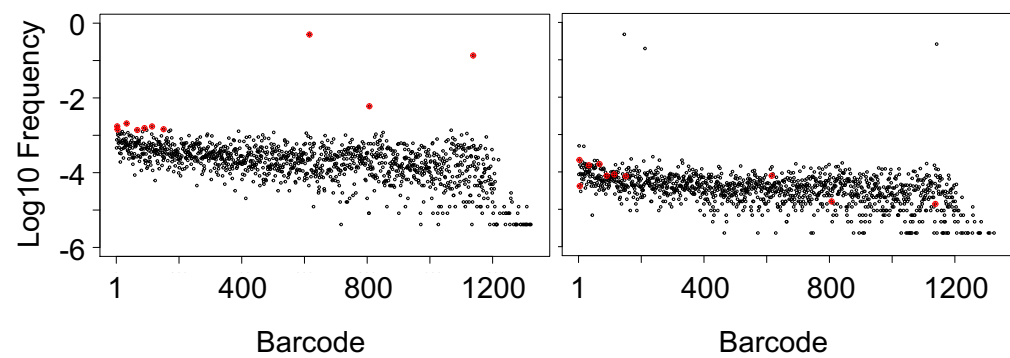**RD = 1183 GD = 0.822**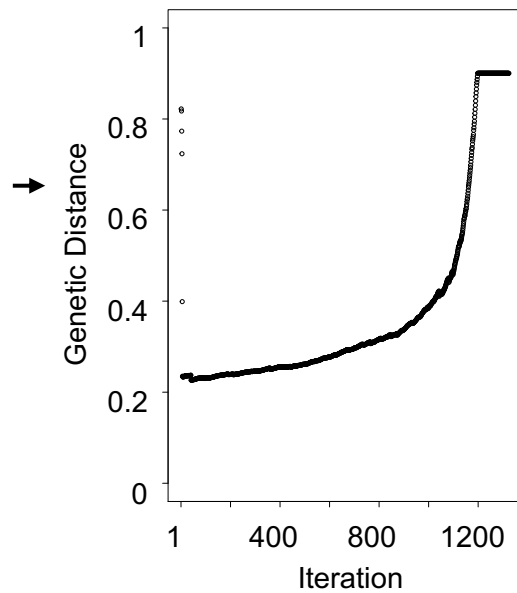**B**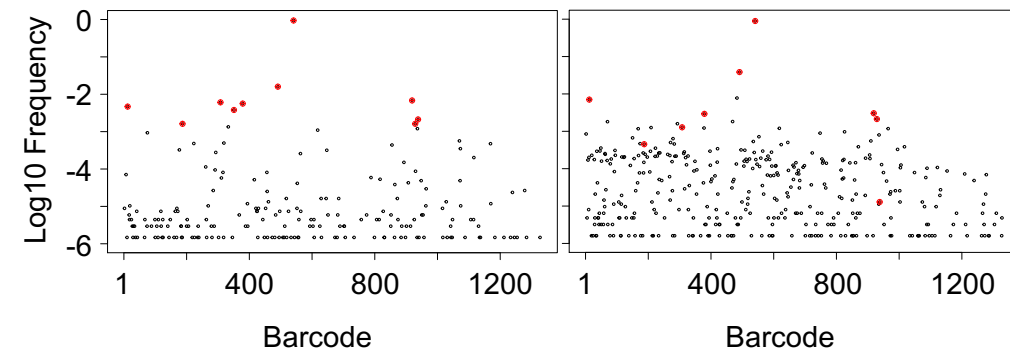**RD = 7 GD = 0.016**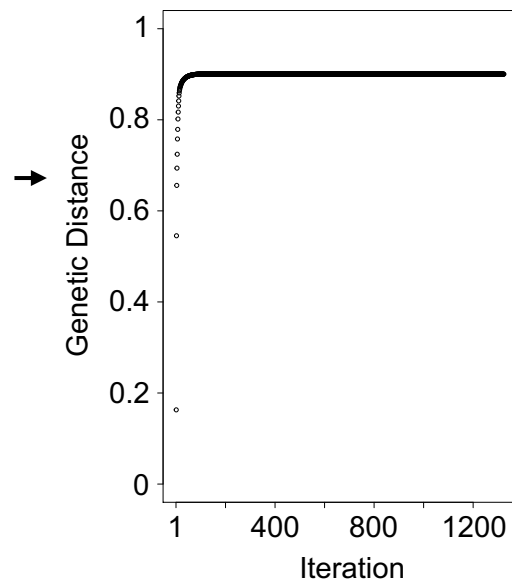**C**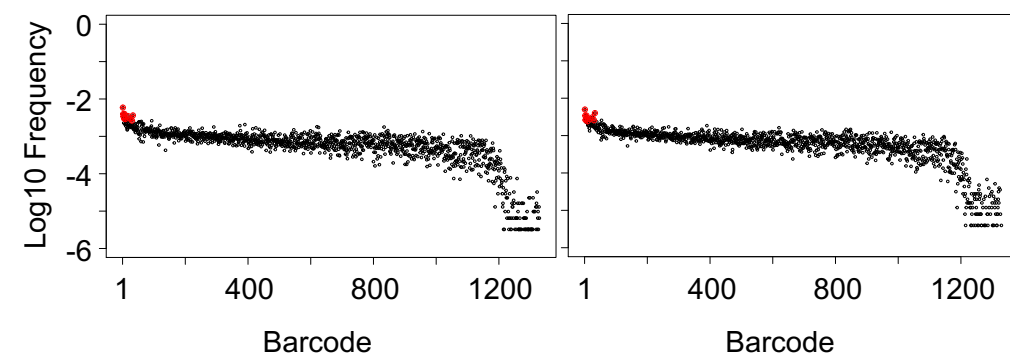**RD = 1283 GD = 0.051**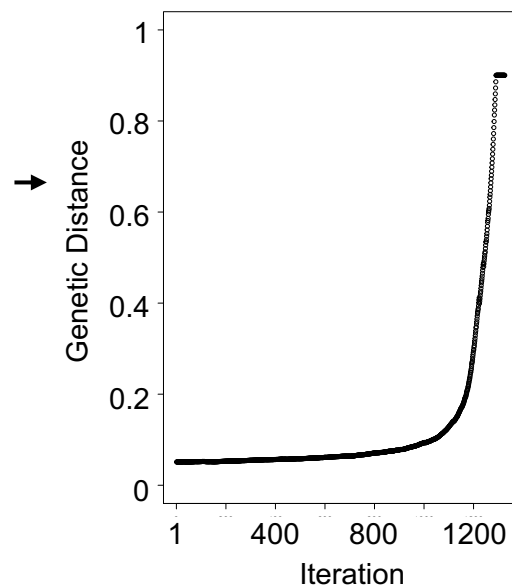

Supplement: msystems.00887-21-sf005.pdf [file msystems.00887-21-sf005.pdf]
