# Supplementary material for: Refined Quantification of Infection Bottlenecks and Pathogen Dissemination with STAMPR
Source: PubMed Central journal article supplement (PMC8407386; doi:10.1128/msystems.00887-21), 2021-08-17

### Mouse 2

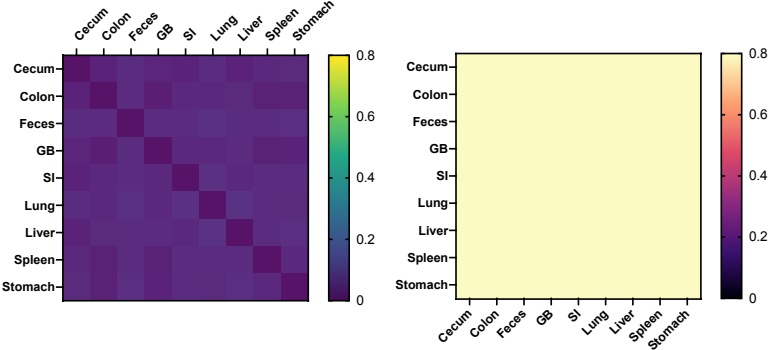

### Mouse 6

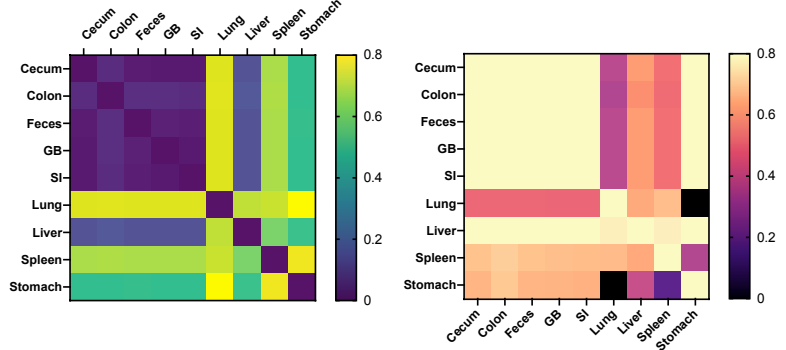

### Mouse 3

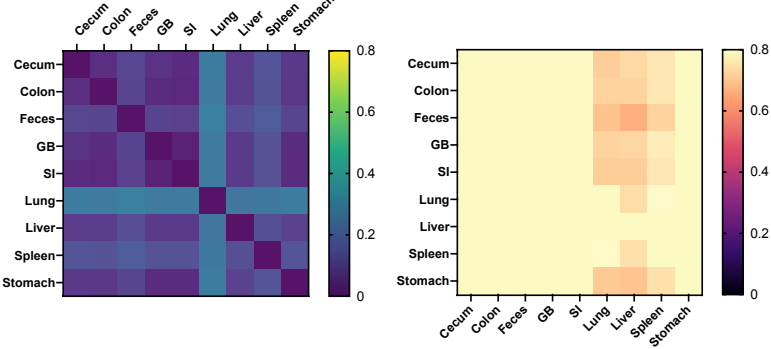

### Mouse 7

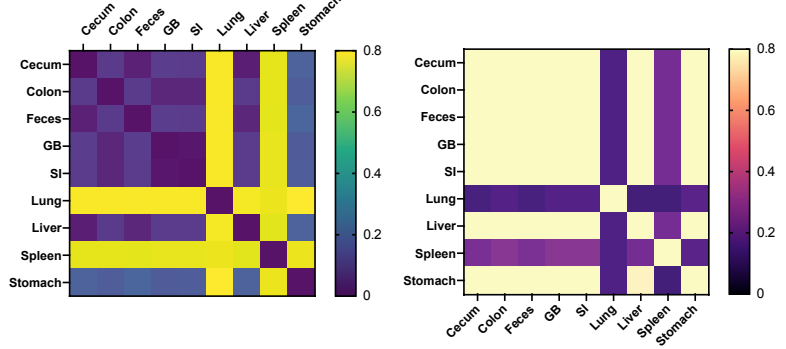

### Mouse 4

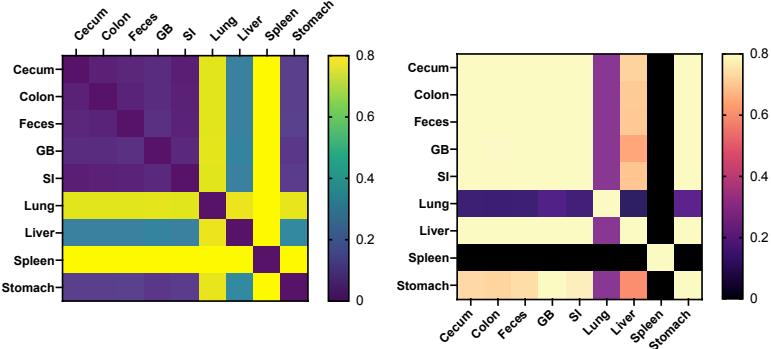

### Mouse 8

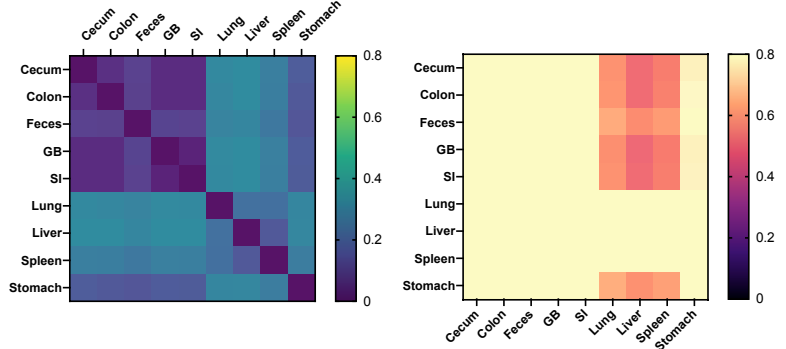

### Mouse 5

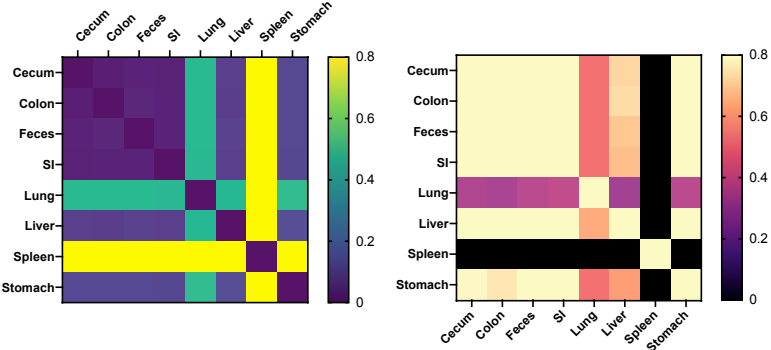

### Mouse 9

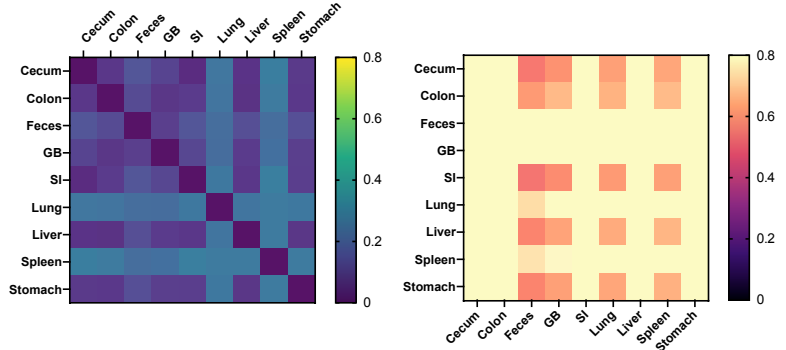

### Mouse 10

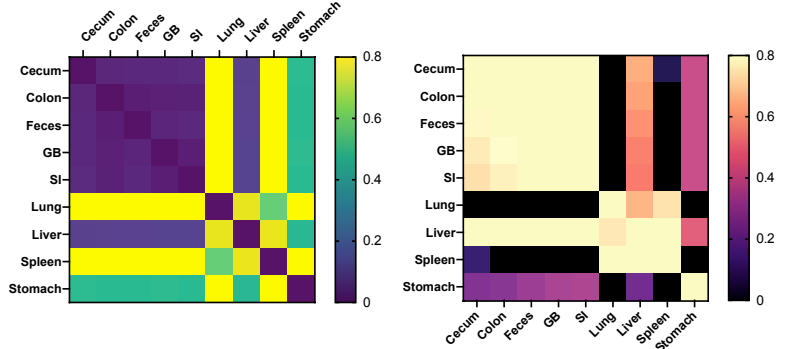

Supplement: msystems.00887-21-sf006.pdf [file msystems.00887-21-sf006.pdf]
